# Supplementary material for: Enhanced catalytic oxidation of toluene over amorphous cubic structured manganese oxide-based catalysts promoted by functionally designed Co–Fe nanowires
Source: Royal Society of Chemistry journal article supplement (doi:10.1039/d4cy00022f), 2024-01-01
Supplement: d4cy00022f1.pdf [file d4cy00022f1.pdf]

## Supporting information

# Enhanced catalytic oxidation of toluene over amorphous cubic structured manganese oxide based catalysts promoted by functional designed Co-Fe nanowires

*Jing Wang<sup>a,\*</sup>, Zhijun Wu<sup>b</sup>, Jinggang Zhao<sup>c</sup>, Ming Sun<sup>a</sup>, Xiaoxun Ma<sup>a</sup>, Abuliti Abudula<sup>c</sup>, Guoqing Guan<sup>c,d,\*</sup>*

*<sup>a</sup> School of Chemical Engineering, Northwest University, International Science & Technology Cooperation Base of MOST for Clean Utilization of Hydrocarbon Resources, Chemical Engineering Research Center of the Ministry of Education for Advanced Use Technology of Shanbei Energy, Shaanxi Research Center of Engineering Technology for Clean Coal Conversion, Collaborative Innovation Center for Development of Energy and Chemical Industry in Northern Shaanxi, Xi'an 710069, Shaanxi, China*

*<sup>b</sup> Xi'an Technological University, Xi'an 710021, Shaanxi, China*

*<sup>c</sup> Graduate School of Science and Technology, Hirosaki University, 1-Bunkyochō, Hirosaki 036-8560, Aomori, Japan*

*<sup>d</sup> Energy Conversion Engineering Laboratory, Institute of Regional Innovation (IRI), Hirosaki University, 3-Bunkyochō, Hirosaki 036-8561, Aomori, Japan*

Corresponding Authors

E-mail addresses: [wjing3072@163.com](mailto:wjing3072@163.com) (J. Wang); [guan@hirosaki-u.ac.jp](mailto:guan@hirosaki-u.ac.jp) (G. Guan)

## 1. Characterizations of catalysts

Morphology and surface elemental composition of the prepared catalyst were analyzed by a scanning electron microscopy (SEM) (Hitachi SU8010, Japan) equipped with an X-ray spectrometry (EDX) (Horiba EMAX). Crystalline structure was investigated by an XRD equipment (Rigaku Smartlab, Japan) with a Cu-K $\alpha$  radiation ( $\lambda=0.15418$  nm) in a range of 10°-90° with a scanning rate of 4° min<sup>-1</sup>. Transmission electron microscopy (TEM) analysis was carried out on a JEM-2100F TEM JEOL instrument operating at 200 kV. An X-ray photoelectron spectroscopy (XPS, Thermo-Scientific ESCALab250i) equipped with an Al-K $\alpha$  radiation (K $\alpha=1486.6$  eV) was applied to investigate the surface chemical composition and elemental valence states, in which the C 1s peak was fixed at the binding energy (BE) of 284.6 eV. Raman analysis was performed using a JASCO NRS-5100 Raman spectrometer at 532 nm. Hydrogen temperature-programmed reduction (H<sub>2</sub>-TPR) and oxygen temperature-programmed desorption (O<sub>2</sub>-TPD) were conducted on a BELCAT catalyst analyzer with a thermal conductivity detector (TCD). For each of test, 50 mg catalyst was loaded into a U-shape tube, which was pretreated firstly at 300 °C for 30 min with a helium flow (50 cm<sup>3</sup>/min) and cooled down to room temperature (RT). Thereafter, the temperature was raised from RT to 800 °C with a heating rate of 10 °C/min under a gas flow of 5 vol% H<sub>2</sub>/Ar (50 cm<sup>3</sup>/min). For the O<sub>2</sub>-TPD analysis, 150 mg of sample was pre-treated in the helium flow (50 cm<sup>3</sup>/min) for 1 h in order to remove surface water. After cooling down to RT, the sample was treated by a O<sub>2</sub> flow (50 cm<sup>3</sup>/min) and purged by a helium flow (50 mL/min) for 1 h, successively. Finally, the sample was heated from RT to 900 °C at a rate of 10 °C/min for the analysis.

*In-situ* DRIFTS analysis was carried out for the investigation of the catalytic oxidation process, which was conducted on a Frontier FTIR spectrometer (PerkinElmer) equipped with a DRIFTS cell and a MCT detector, and the test range is from 4000 to 650 cm<sup>-1</sup> with 32 scans. In details, the optimum sample, i.e., 5Mn/Co-Fe/NF sample, was firstly pre-treated by a pure nitrogen-flow (100 cm<sup>3</sup>/min) with the increasing of reaction temperature and then maintained the temperature at 300 °C for 30 min to remove out of those adsorbed impurity. Subsequently, the background signals were collected in N<sub>2</sub> atmosphere when the temperature was cooled down to 250 °C. Under the constant temperature, the reactant

substance of toluene containing gas (1000 ppm) was introduced into the *in-situ* test chamber by a continuous N<sub>2</sub> gas flow with a flow rate of 100 cm<sup>3</sup>/min, and meanwhile, the DRIFTS spectrum was recorded for 50 min. Soon after, N<sub>2</sub> purging was conducted for 60 min without toluene vapor accompanying. For the O<sub>2</sub>/N<sub>2</sub> atmosphere, the test process was the same as that of the N<sub>2</sub> atmosphere, in which the DRIFTS spectrum was recorded in the range of 4000–650 cm<sup>-1</sup> as the above described.

## 2. Catalytic activity test

Catalytic performance of the prepared sample was evaluated on a fixed-bed system with a continuous flow at atmospheric pressure. In the test, the obtained catalyst coated NF was cut into small pieces with the size of 3 × 3 mm<sup>2</sup>, then 0.1 g of this catalyst was mixed with 0.3 g of silica sand (40~60 mesh) and transferred into a Pyrex reaction tube (i.d.=10 mm) with silicon wools packed at both ends of the catalyst bed. The packed catalysts were firstly pretreated in a nitrogen flow at 100 °C for 1.5 h. The reaction temperature was set in the range of 150-300 °C, and a mixture of a toluene (900 ppm), oxygen (O<sub>2</sub>, 20 vol%), nitrogen (N<sub>2</sub>, 80 vol% as balance) as the reaction gas with the total flow rate of 50 cm<sup>3</sup>/min (at the standard temperature and pressure) was introduced into the reactor. For the optimum catalyst, its performances were also evaluated at different weight hourly space velocities (WHSVs) as well as different gaseous hourly space velocities (GHSVs) with the different catalyst amounts of 50 (WHSV=60,000 mL g<sup>-1</sup> h<sup>-1</sup>) and 150 mg (WHSV=20,000 mL g<sup>-1</sup> h<sup>-1</sup>), respectively. Simultaneously, the catalytic performances at different GHSVs by fixing the catalyst weight at 100 mg and increasing the total flow rate to 100 (GHSV=60,000 mL g<sup>-1</sup> h<sup>-1</sup>) and 140 mL (WGHSV=84,000 mL g<sup>-1</sup> h<sup>-1</sup>), respectively, were also conducted. The effect of water vapor on the catalytic performance was investigated by introducing 5.0 and 10 vol% of water vapors to the gas mixture through a saturated water bubbler. The inlet and outlet concentrations of toluene were analyzed by an on-line gas chromatograph (Shimadzu-2014) accompanied by a flame ionization detector (FID), and meanwhile, the produced CO<sub>2</sub> in the off-gas was detected online by a FTIR gas analyzer (Horiba, FG-120).

Herein, toluene conversion and CO<sub>2</sub> selectivity were calculated by the following formula:

$$X_{\text{Conversion}} = \frac{C_{\text{Inlet}} - C_{\text{Outlet}}}{C_{\text{Inlet}}} \times 100\% \quad (1)$$

$$\text{CO}_2 \text{ selectivity} = \frac{C_{\text{CO}_2}}{7(C_{\text{Inlet}} - C_{\text{Outlet}})} \times 100\% \quad (2)$$

where  $C_{\text{Inlet}}$  and  $C_{\text{Outlet}}$  are toluene concentrations of inlet and outlet of the reactor, respectively. In this work, the carbon balances of all experiments were closed with errors lower than 5%, as it stated in our previous work.<sup>1</sup>

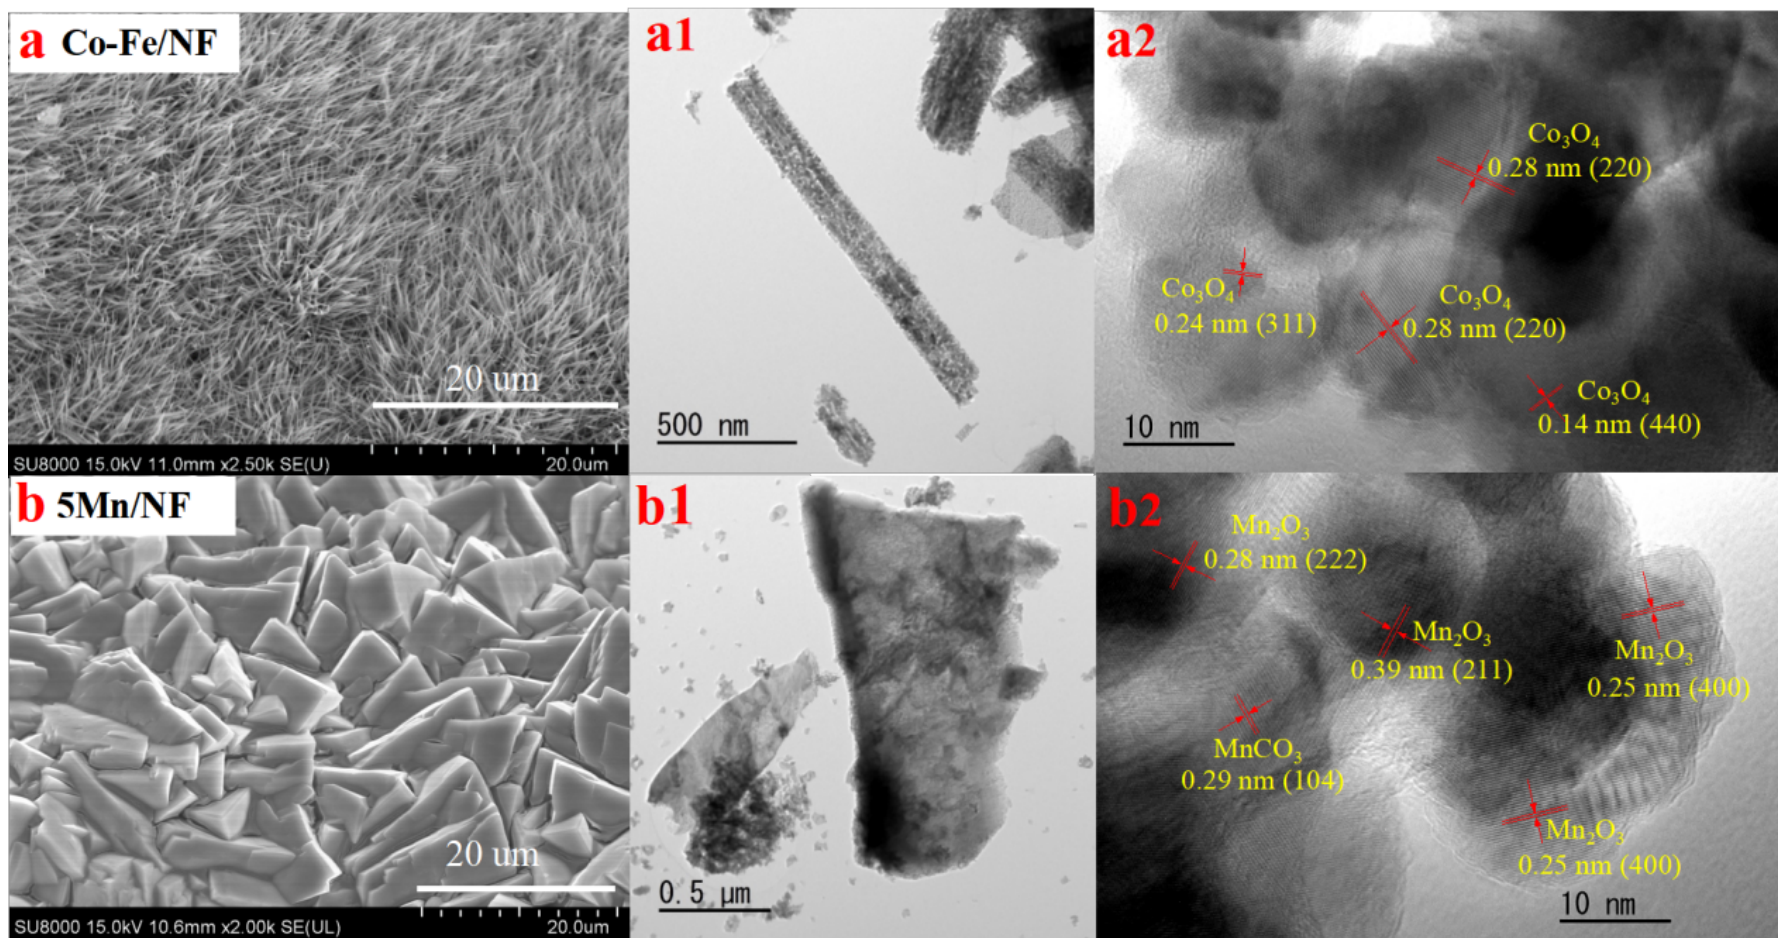

**Figure S1.** SEM and TEM images of the Co-Fe/NF and 5Mn/NF catalysts.

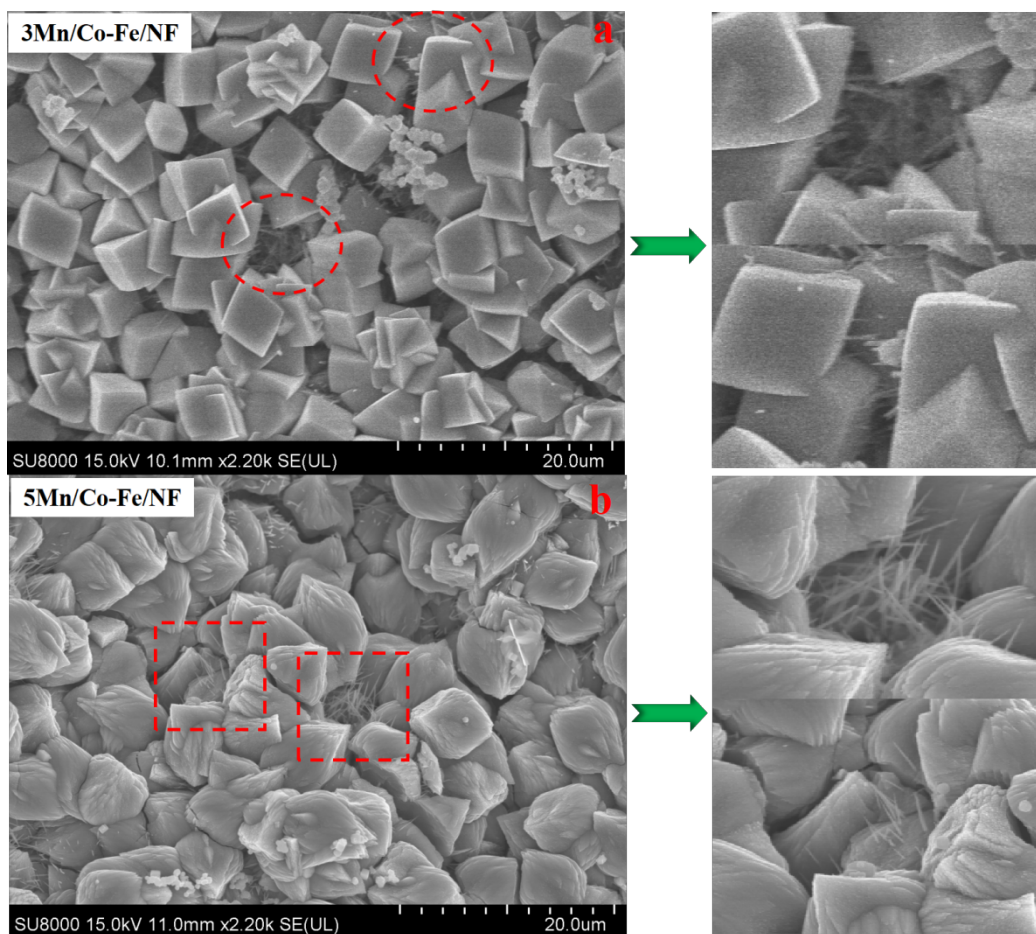

**Figure S2.** SEM images of the Mn/Co-Fe/NF catalysts.

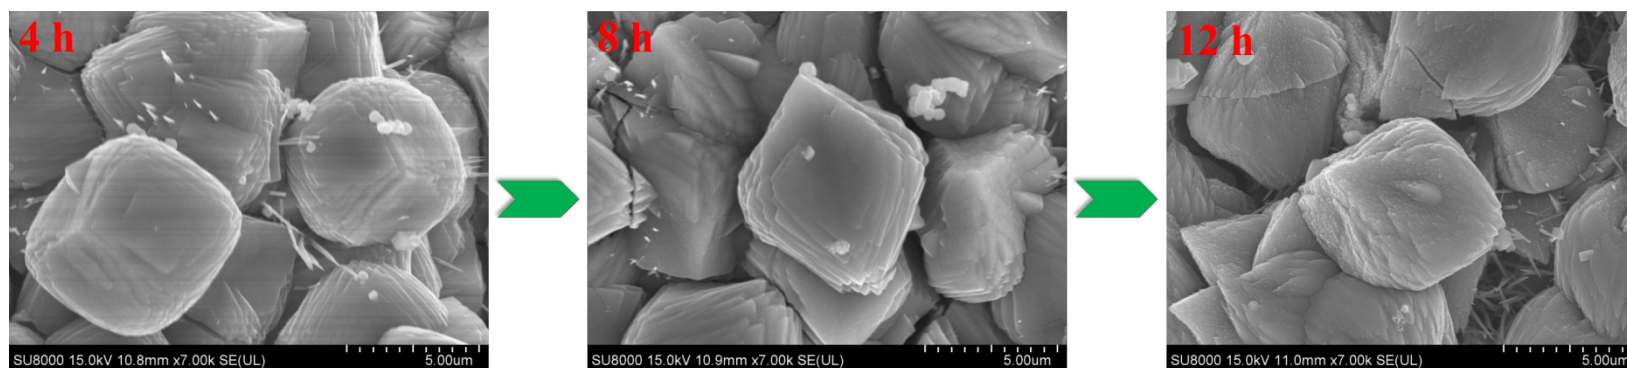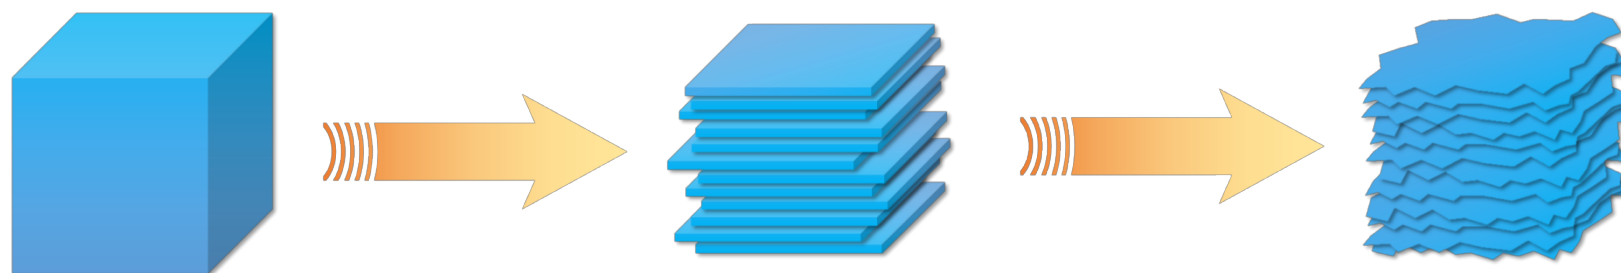

**Figure S3.** formation process of 5Mn/Co-Fe/NF catalyst displayed by SEM images.



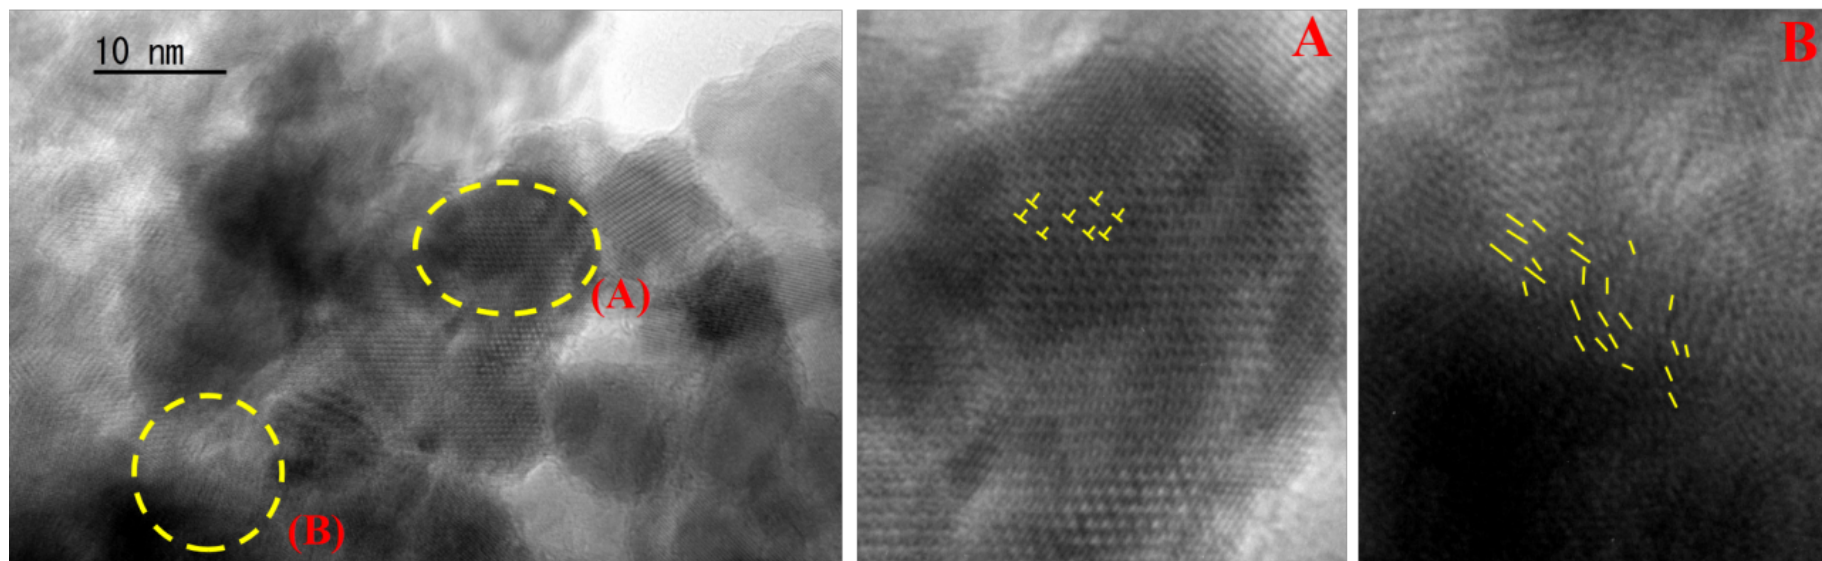

**Figure S4.** TEM images of the 5Mn/Co-Fe/NF catalyst (A and B are the enlarged TEM images).



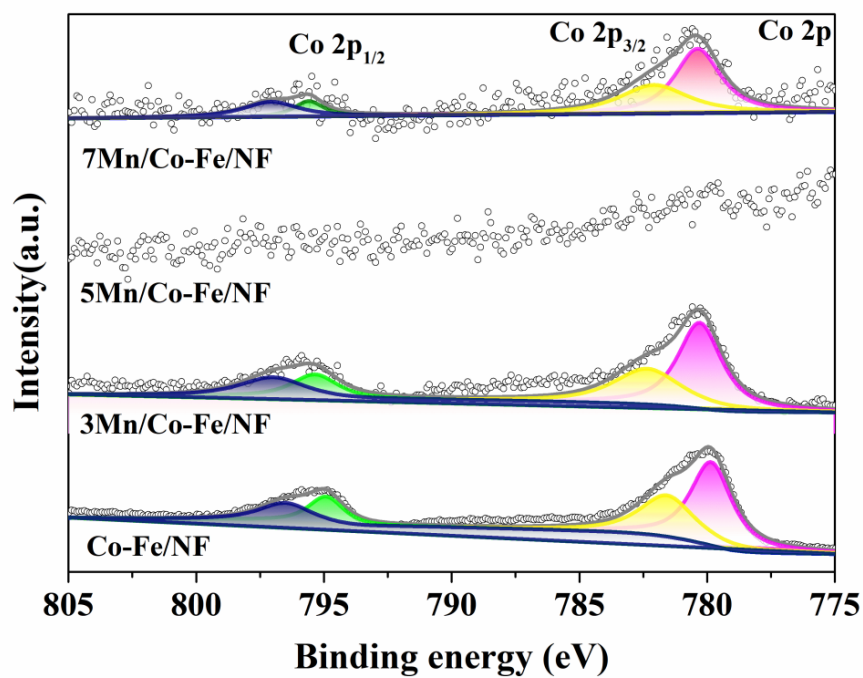

Figure S5. Co 2p XPS spectra of the prepared catalysts.

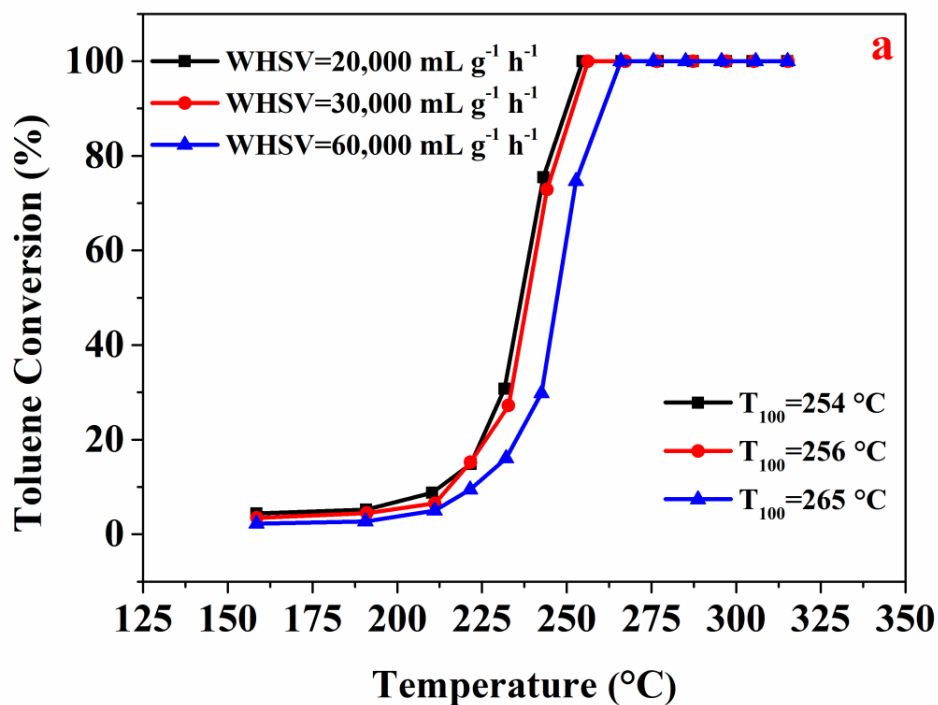

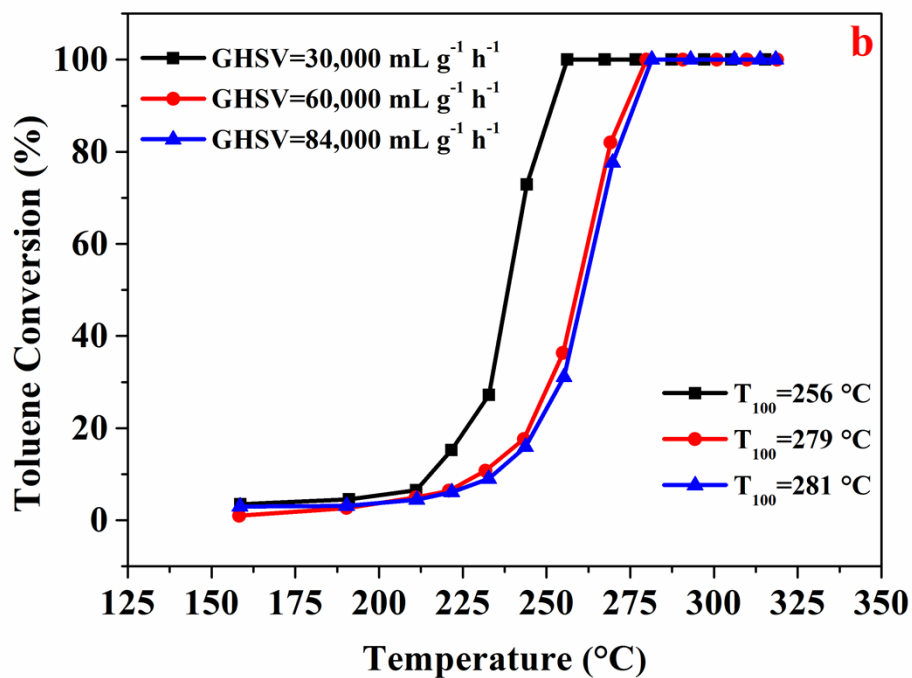

**Figure S6.** Catalytic toluene oxidation over 5Mn/Co-Fe/NF catalyst at different values of WHSV (a) and GHSV (b).

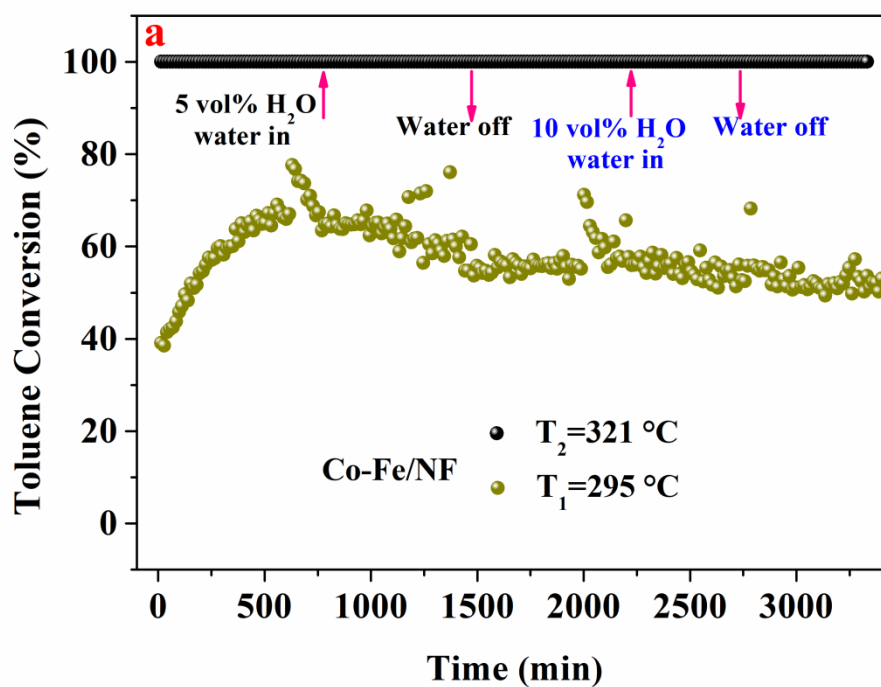

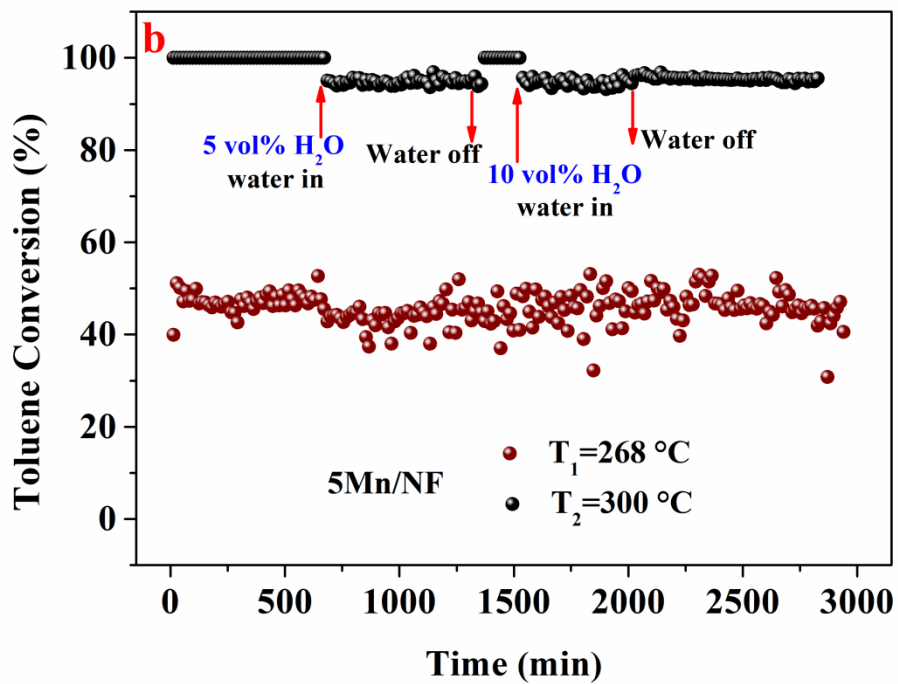

**Figure S7.** Long-term evaluation at different reaction temperatures and the effect of water vapor in the catalytic toluene oxidation over Co-Ce/NF (a) and 5Mn/NF (b) catalysts.

**Table S1** Reported works related to the catalytic oxidation of toluene for comparison.

| Sample                                                                                         | VOCs concentration (ppm) | WHSV (mL.g <sup>-1</sup> .h <sup>-1</sup> ) | Toluene conversion (%) | Temperature (°C) | References |
|------------------------------------------------------------------------------------------------|--------------------------|---------------------------------------------|------------------------|------------------|------------|
| Mn-MOF                                                                                         | 1000                     | 60,000                                      | 90                     | 267              | [2]        |
| Layered $\delta$ -MnO <sub>2</sub>                                                             | 1000                     | 60,000                                      | 90                     | 199              | [3]        |
| Mn-Cu hollow microsphere                                                                       | 1000                     | 30,000                                      | 100                    | 252              | [4]        |
| Mesoporous hollow structured Mn-Co oxide                                                       | 1000                     | 60,000                                      | 90                     | 247              | [5]        |
| Manganese oxide Coral-like hierarchical structured La <sub>y</sub> MnO <sub>x</sub> nanosphere | 1000                     | 90,000                                      | 100                    | 240              | [6]        |
| MnO <sub>2</sub> with different crystal                                                        | 1000                     | 20,000                                      | 95                     | 218              | [7]        |
| MnO <sub>2</sub> with different crystal                                                        | 1000                     | 30,000                                      | 90                     | 228              | [8]        |
| Cubic structured Mn/Co-Fe/NF                                                                   | 1000                     | 30,000                                      | 100                    | 256              | This work  |

## Reference

- 1 J. Wang, A. Yoshida, P. Wang, T. Yu, Z. Wang, X. Hao, A. Abudula, G. Guan, Appl. Catal. B-Environ. 2020, **271**, 118941.
- 2 J. Wang, D. Zhang, G. Zhao, H. Yuan, D. Liu, A T. Kuvarega, B B. Mamba, H. Li, J. Gui, Colloids. Surfaces. A. 2024, **686**, 133357.
- 3 R. Li, L. Zhang, S Zhu, S. Zhu, S. Fu, X. Dong, S. Idac, L. Zhang, L. Guo, Appl. Catal. A-Gen. 2020, **602**, 117715.
- 4 Z. Xiao, J. Yang, R. Ren, J. Li, N. Wang, W. Chu, Chemosphere. 2020, **247**, 125812.
- 5 P. Liu, Y. Liao, J. Li, L. Chen, M. Fu, P. Wu, R. Zhu, X. Liang, T. Wu, D. Ye, J. Colloid. Interf. Sci. 2021, **594**, 713-726.
- 6 Y Lyu, C Li, X Du, Y. Zhu, Y. Zhang, S. Li, Fuel, 2020, **262**, 116610.
- 7 M. Li, C. Zhang, L. Fan, Y. Lian, X. Niu, Y. Zhu, ACS. Appl. Mater. Interfaces. 2021, **13**, 10089-10100
- 8 X. Zhai, L. Li, S. Song, J. Zhang, J. Ma, C. Xie, W. Chu, Fuel. 2023, **334**, 126780.
